# Supplementary material
Source: PubMed Central journal article supplement (PMC4479039)
Supplement: ncomms8152-s1.pdf [file ncomms8152-s1.pdf]

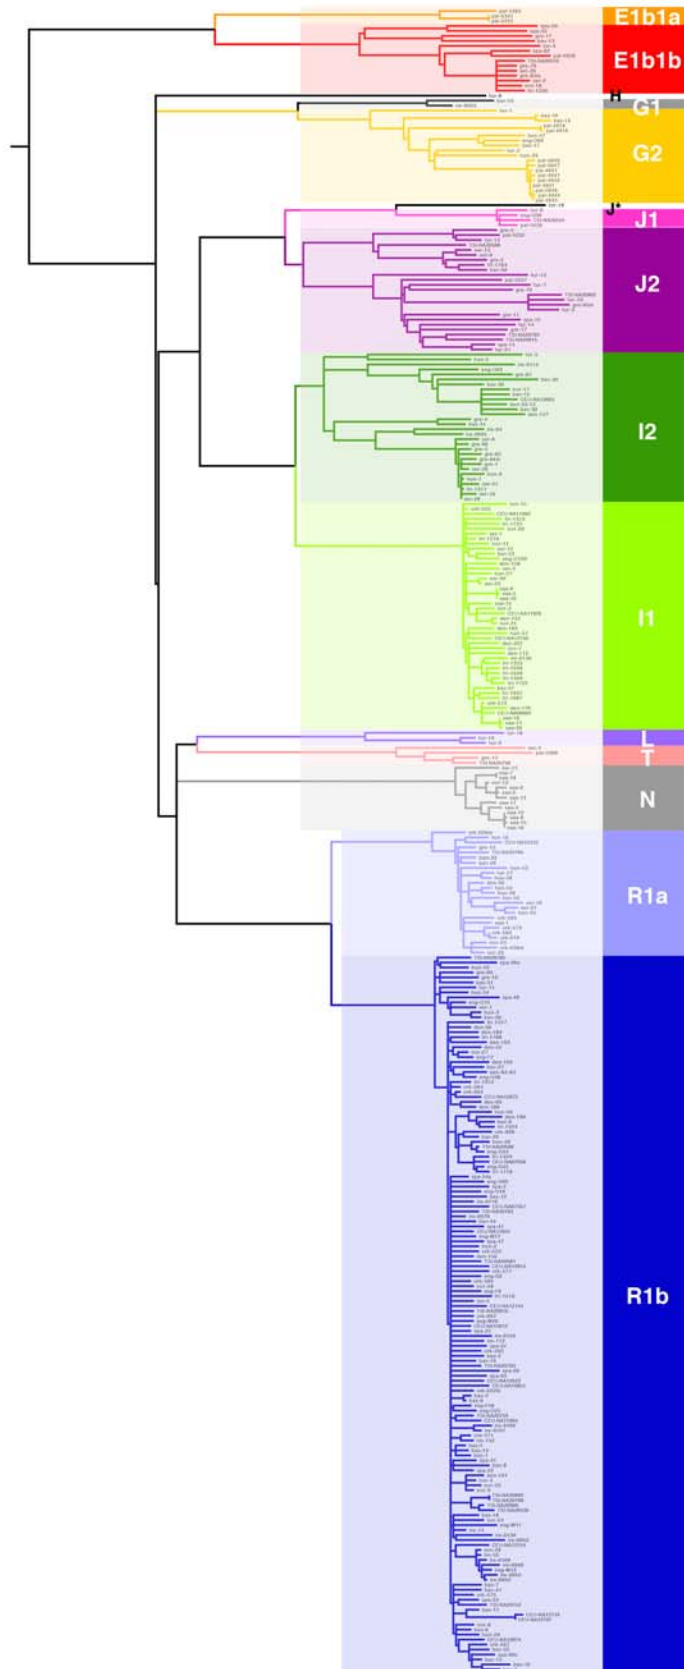

**Supplementary Figure 1.** Maximum parsimony tree showing sample names. The tree structure is the same as that shown in Figure 1a. Names include a three-letter prefix indicating population, according to the legend of Figure 1.

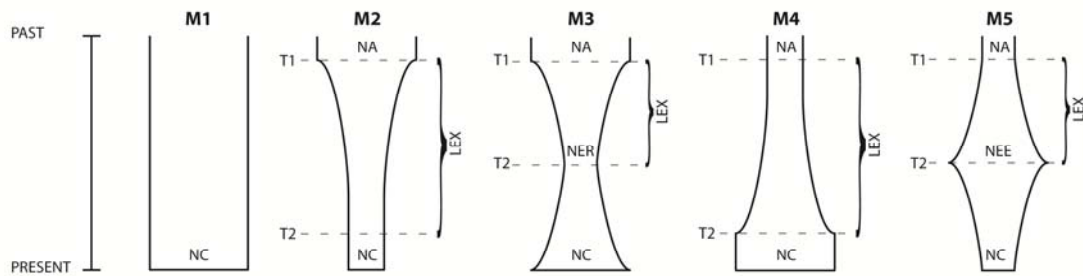

**Supplementary Figure 2:** Models used in ABC analysis. NC, current effective population size; NA, ancestral effective population size; T1, time of the beginning of the demographic change; T2, time of the end of the demographic change; LEX, length of the expansion/reduction; NER, effective population size after reduction; LEE, effective population size after expansion.

**Supplementary Table 1: Sample information.**

| Sample name | Population | Haplogroup     | In final analysis? | Mean raw coverage in final analysed regions (3.72Mb) | No. of singletons (whole dataset) | No. of singletons (within-population) | Total mutations from root (as in Fig. 1) |
|-------------|------------|----------------|--------------------|------------------------------------------------------|-----------------------------------|---------------------------------------|------------------------------------------|
| bas-1       | Basque     | R1b1b2-S116    | yes                | 43,9                                                 | 6                                 | 6                                     | 171                                      |
| bas-10      | Basque     | R1b1b2-M153    | yes                | 44,9                                                 | 11                                | 11                                    | 186                                      |
| bas-11      | Basque     | R1b1b2-SRY2627 | yes                | 45,8                                                 | 4                                 | 10                                    | 174                                      |
| bas-12      | Basque     | R1b1b2-S116    | yes                | 53,6                                                 | 14                                | 14                                    | 177                                      |
| bas-13      | Basque     | R1b1b2-S116    | yes                | 49,6                                                 | 5                                 | 5                                     | 170                                      |
| bas-14      | Basque     | I2a-P37.2      | yes                | 45,1                                                 | 11                                | 119                                   | 169                                      |
| bas-15      | Basque     | R1b1b2-S116    | yes                | 40,8                                                 | 4                                 | 4                                     | 175                                      |
| bas-16      | Basque     | G2a-L31        | yes                | 54,7                                                 | 1                                 | 1                                     | 197                                      |
| bas-17      | Basque     | G2a-L31        | yes                | 57,3                                                 | 14                                | 45                                    | 190                                      |
| bas-18      | Basque     | R1b1b2-S116    | yes                | 52,4                                                 | 10                                | 11                                    | 174                                      |
| bas-19      | Basque     | G2a-L31        | yes                | 51,6                                                 | 6                                 | 6                                     | 202                                      |
| bas-2       | Basque     | R1b1b2-S116    | yes                | 36,0                                                 | 13                                | 13                                    | 176                                      |
| bas-20      | Basque     | excluded       | no, missing data   | 10,4                                                 | n/a                               | n/a                                   | n/a                                      |
| bas-3       | Basque     | R1b1b2-S116    | yes                | 49,7                                                 | 3                                 | 3                                     | 171                                      |
| bas-4       | Basque     | R1b1b2-M153    | yes                | 41,4                                                 | 7                                 | 7                                     | 182                                      |
| bas-5       | Basque     | R1b1b2-S116    | yes                | 49,9                                                 | 4                                 | 4                                     | 169                                      |
| bas-6       | Basque     | R1b1b2-S116    | yes                | 52,9                                                 | 6                                 | 6                                     | 171                                      |
| bas-7       | Basque     | R1b1b2-S116    | yes                | 47,7                                                 | 11                                | 11                                    | 175                                      |
| bas-8       | Basque     | R1b1b2-S116    | yes                | 40,1                                                 | 14                                | 15                                    | 178                                      |
| bas-9       | Basque     | R1b1b2-S116    | yes                | 58,9                                                 | 1                                 | 1                                     | 169                                      |
| bav-12      | Bavarian   | I2b-P214       | yes                | 47,1                                                 | 11                                | 11                                    | 186                                      |
| bav-13      | Bavarian   | E1b1b1c-M123   | yes                | 60,5                                                 | 36                                | 245                                   | 196                                      |
| bav-19      | Bavarian   | R1b1b2-S116    | yes                | 47,5                                                 | 10                                | 10                                    | 173                                      |
| bav-26      | Bavarian   | R1a-M198       | yes                | 54,2                                                 | 6                                 | 7                                     | 173                                      |
| bav-27      | Bavarian   | R1b1b2-L11     | yes                | 60,8                                                 | 12                                | 14                                    | 176                                      |
| bav-29      | Bavarian   | R1b1b2-L11     | yes                | 53,2                                                 | 6                                 | 9                                     | 174                                      |
| bav-30      | Bavarian   | I2b-P214       | yes                | 48,5                                                 | 14                                | 14                                    | 189                                      |
| bav-31      | Bavarian   | R1b1b2-M269    | yes                | 60,5                                                 | 13                                | 15                                    | 172                                      |
| bav-32      | Bavarian   | R1b1b2-S116    | yes                | 56,7                                                 | 8                                 | 14                                    | 178                                      |
| bav-38      | Bavarian   | J2b2-M241      | yes                | 55,3                                                 | 10                                | 111                                   | 177                                      |
| bav-39      | Bavarian   | I2b-P214       | yes                | 55,1                                                 | 18                                | 18                                    | 176                                      |
| bav-40      | Bavarian   | I2b-P214       | yes                | 47,6                                                 | 38                                | 39                                    | 197                                      |
| bav-41      | Bavarian   | R1b1b2-S116    | yes                | 52,1                                                 | 11                                | 11                                    | 175                                      |
| bav-52      | Bavarian   | R1a-M198       | yes                | 56,2                                                 | 11                                | 16                                    | 182                                      |
| bav-53      | Bavarian   | I1-M253        | yes                | 43,2                                                 | 7                                 | 12                                    | 180                                      |
| bav-54      | Bavarian   | R1b1b2-S116    | yes                | 57,2                                                 | 10                                | 10                                    | 173                                      |

| Sample name | Population   | Haplogroup     | In final analysis? | Mean raw coverage in final analysed regions (3.72Mb) | No. of singletons (whole dataset) | No. of singletons (within-population) | Total mutations from root (as in Fig. 1) |
|-------------|--------------|----------------|--------------------|------------------------------------------------------|-----------------------------------|---------------------------------------|------------------------------------------|
| bav-55      | Bavarian     | G1-M285        | yes                | 51,9                                                 | 25                                | 131                                   | 180                                      |
| bav-56      | Bavarian     | R1b1b2-M269    | yes                | 48,9                                                 | 4                                 | 18                                    | 175                                      |
| bav-57      | Bavarian     | I1-M253        | yes                | 63,0                                                 | 8                                 | 12                                    | 180                                      |
| bav-8       | Bavarian     | R1b1b2-L11     | yes                | 39,2                                                 | 6                                 | 15                                    | 180                                      |
| CEU-NA06994 | French (CEU) | I1-M253        | yes                | 50,9                                                 | 5                                 | 11                                    | 180                                      |
| CEU-NA07048 | French (CEU) | R1b1b2-L11     | yes                | 56,2                                                 | 6                                 | 16                                    | 178                                      |
| CEU-NA07357 | French (CEU) | R1b1b2-S116    | yes                | 66,8                                                 | 15                                | 15                                    | 178                                      |
| CEU-NA10851 | French (CEU) | R1b1b2-S116    | yes                | 62,2                                                 | 15                                | 15                                    | 178                                      |
| CEU-NA11829 | French (CEU) | I1-M253        | yes                | 57,0                                                 | 10                                | 16                                    | 184                                      |
| CEU-NA11831 | French (CEU) | R1b1b2-S116    | yes                | 49,9                                                 | 9                                 | 9                                     | 172                                      |
| CEU-NA11992 | French (CEU) | I1-M253        | yes                | 65,7                                                 | 11                                | 12                                    | 180                                      |
| CEU-NA11994 | French (CEU) | R1b1b2-S116    | yes                | 59,8                                                 | 10                                | 12                                    | 175                                      |
| CEU-NA12003 | French (CEU) | I2b-P214       | yes                | 54,9                                                 | 14                                | 86                                    | 189                                      |
| CEU-NA12043 | French (CEU) | R1b1b2-S116    | yes                | 55,7                                                 | 13                                | 13                                    | 176                                      |
| CEU-NA12144 | French (CEU) | R1b1b2-S116    | yes                | 49,6                                                 | 14                                | 14                                    | 177                                      |
| CEU-NA12154 | French (CEU) | R1b1b2-S116    | yes                | 62,4                                                 | 13                                | 15                                    | 178                                      |
| CEU-NA12155 | French (CEU) | R1a-M198       | yes                | 57,0                                                 | 13                                | 66                                    | 183                                      |
| CEU-NA12707 | French (CEU) | R1b1b2-SRY2627 | yes                | 54,3                                                 | 0                                 | 0                                     | 188                                      |
| CEU-NA12716 | French (CEU) | R1b1b2-SRY2627 | yes                | 46,7                                                 | 3                                 | 3                                     | 191                                      |
| CEU-NA12750 | French (CEU) | I1-M253        | yes                | 49,0                                                 | 8                                 | 10                                    | 179                                      |
| CEU-NA12812 | French (CEU) | R1b1b2-S116    | yes                | 47,1                                                 | 8                                 | 8                                     | 171                                      |
| CEU-NA12814 | French (CEU) | R1b1b2-S116    | yes                | 58,9                                                 | 15                                | 15                                    | 178                                      |
| CEU-NA12872 | French (CEU) | R1b1b2-Z18     | yes                | 49,7                                                 | 10                                | 13                                    | 175                                      |
| CEU-NA12874 | French (CEU) | R1b1b2-S116    | yes                | 53,2                                                 | 10                                | 12                                    | 176                                      |
| den-104     | Danish       | R1b1b2-L11     | yes                | 57,4                                                 | 14                                | 15                                    | 177                                      |
| den-113     | Danish       | I1-M253        | yes                | 46,6                                                 | 14                                | 14                                    | 184                                      |
| den-150     | Danish       | R1b1b2-S116    | yes                | 49,1                                                 | 8                                 | 9                                     | 172                                      |
| den-152     | Danish       | I1-M253        | yes                | 54,2                                                 | 2                                 | 12                                    | 181                                      |
| den-157     | Danish       | I2b-P214       | yes                | 44,5                                                 | 16                                | 17                                    | 192                                      |
| den-158     | Danish       | I1-M253        | yes                | 46,9                                                 | 12                                | 12                                    | 181                                      |
| den-176     | Danish       | I1-M253        | yes                | 48,5                                                 | 10                                | 15                                    | 185                                      |
| den-183     | Danish       | I1-M253        | yes                | 47,2                                                 | 10                                | 11                                    | 180                                      |
| den-186     | Danish       | R1b1b2-Z18     | yes                | 46,0                                                 | 6                                 | 6                                     | 173                                      |
| den-189     | Danish       | R1b1b2-L11     | yes                | 55,2                                                 | 12                                | 12                                    | 174                                      |
| den-190     | Danish       | R1b1b2-L11     | yes                | 46,3                                                 | 10                                | 21                                    | 183                                      |
| den-191     | Danish       | R1b1b2-S116    | yes                | 42,3                                                 | 6                                 | 13                                    | 176                                      |

| Sample name | Population | Haplogroup  | In final analysis? | Mean raw coverage in final analysed regions (3.72Mb) | No. of singletons (whole dataset) | No. of singletons (within-population) | Total mutations from root (as in Fig. 1) |
|-------------|------------|-------------|--------------------|------------------------------------------------------|-----------------------------------|---------------------------------------|------------------------------------------|
| den-192     | Danish     | R1b1b2-L11  | yes                | 41,9                                                 | 14                                | 15                                    | 178                                      |
| den-207     | Danish     | I1-M253     | yes                | 52,1                                                 | 12                                | 12                                    | 182                                      |
| den-30      | Danish     | R1a-M198    | yes                | 49,7                                                 | 6                                 | 59                                    | 176                                      |
| den-34      | Danish     | R1b1b2-U198 | yes                | 52,9                                                 | 11                                | 13                                    | 175                                      |
| den-36      | Danish     | R1b1b2-L11  | yes                | 54,6                                                 | 9                                 | 9                                     | 171                                      |
| den-50-51   | Danish     | I2b-P214    | yes                | 43,4                                                 | 10                                | 10                                    | 185                                      |
| den-82-83   | Danish     | R1b1b2-L11  | yes                | 49,5                                                 | 8                                 | 14                                    | 177                                      |
| den-SN      | Danish     | R1b1b2-Z18  | yes                | 45,2                                                 | 8                                 | 8                                     | 175                                      |
| eng-F2      | English    | R1b1b2-U198 | yes                | 53,4                                                 | 6                                 | 10                                    | 172                                      |
| eng-F58     | English    | R1b1b2-S116 | yes                | 47,3                                                 | 5                                 | 7                                     | 171                                      |
| eng-F6      | English    | R1b1b2-S116 | yes                | 41,3                                                 | 10                                | 12                                    | 175                                      |
| eng-G9      | English    | R1b1b2-S116 | yes                | 40,2                                                 | 12                                | 12                                    | 175                                      |
| eng-H18     | English    | R1b1b2-S116 | yes                | 44,6                                                 | 11                                | 11                                    | 175                                      |
| eng-H38     | English    | R1b1b2-L11  | yes                | 31,2                                                 | 5                                 | 11                                    | 173                                      |
| eng-N5      | English    | excluded    | no, female         | 0,2                                                  | n/a                               | n/a                                   | n/a                                      |
| eng-O109    | English    | I1-M253     | yes                | 49,5                                                 | 8                                 | 79                                    | 182                                      |
| eng-O15     | English    | R1b1b2-M269 | yes                | 37,5                                                 | 6                                 | 12                                    | 169                                      |
| eng-O23     | English    | R1b1b2-S116 | yes                | 43,7                                                 | 9                                 | 9                                     | 173                                      |
| eng-O36     | English    | J1e-P58     | yes                | 55,0                                                 | 7                                 | 122                                   | 189                                      |
| eng-O44     | English    | R1b1b2-L11  | yes                | 34,3                                                 | 3                                 | 10                                    | 176                                      |
| eng-O45     | English    | R1b1b2-L11  | yes                | 40,9                                                 | 3                                 | 10                                    | 176                                      |
| eng-O63     | English    | I2a-P37.2   | yes                | 50,6                                                 | 23                                | 71                                    | 174                                      |
| eng-O69     | English    | G2a-L31     | yes                | 41,2                                                 | 13                                | 142                                   | 190                                      |
| eng-O93     | English    | R1b1b2-S116 | yes                | 48,2                                                 | 11                                | 13                                    | 176                                      |
| eng-W11     | English    | R1b1b2-S116 | yes                | 39,4                                                 | 17                                | 18                                    | 181                                      |
| eng-W13     | English    | R1b1b2-M222 | yes                | 40,2                                                 | 4                                 | 16                                    | 179                                      |
| eng-W17     | English    | R1b1b2-S116 | yes                | 45,1                                                 | 10                                | 10                                    | 173                                      |
| eng-W20     | English    | R1b1b2-S116 | yes                | 42,2                                                 | 9                                 | 9                                     | 172                                      |
| fri-1048    | Frisian    | I1-M253     | yes                | 51,0                                                 | 5                                 | 5                                     | 182                                      |
| fri-1087    | Frisian    | I1-M253     | yes                | 59,9                                                 | 8                                 | 8                                     | 182                                      |
| fri-1309    | Frisian    | I1-M253     | yes                | 60,2                                                 | 3                                 | 3                                     | 182                                      |
| fri-1311    | Frisian    | I2a-P37.2   | yes                | 57,7                                                 | 1                                 | 65                                    | 168                                      |
| fri-1312    | Frisian    | I1-M253     | yes                | 49,7                                                 | 14                                | 14                                    | 183                                      |
| fri-1313    | Frisian    | R1b1b2-Z18  | yes                | 41,1                                                 | 8                                 | 9                                     | 171                                      |
| fri-1317    | Frisian    | R1b1b2-L11  | yes                | 50,4                                                 | 14                                | 14                                    | 176                                      |
| fri-1319    | Frisian    | I1-M253     | yes                | 48,8                                                 | 4                                 | 5                                     | 173                                      |
| fri-1320    | Frisian    | E1b1ba2-V13 | yes                | 62,6                                                 | 11                                | 242                                   | 192                                      |
| fri-1324    | Frisian    | R1b1b2-L11  | yes                | 47,0                                                 | 6                                 | 15                                    | 180                                      |

| Sample name | Population | Haplogroup   | In final analysis? | Mean raw coverage in final analysed regions (3.72Mb) | No. of singletons (whole dataset) | No. of singletons (within-population) | Total mutations from root (as in Fig. 1) |
|-------------|------------|--------------|--------------------|------------------------------------------------------|-----------------------------------|---------------------------------------|------------------------------------------|
| fri-1325    | Frisian    | I1-M253      | yes                | 42,0                                                 | 6                                 | 7                                     | 182                                      |
| fri-1329    | Frisian    | R1b1b2-L11   | yes                | 51,5                                                 | 6                                 | 6                                     | 178                                      |
| fri-1516    | Frisian    | R1b1b2-S116  | yes                | 50,8                                                 | 15                                | 17                                    | 179                                      |
| fri-1718    | Frisian    | R1b1b2-L11   | yes                | 53,7                                                 | 5                                 | 6                                     | 178                                      |
| fri-1722    | Frisian    | I1-M253      | yes                | 46,6                                                 | 5                                 | 5                                     | 184                                      |
| fri-1725    | Frisian    | I1-M253      | yes                | 61,8                                                 | 13                                | 13                                    | 182                                      |
| fri-1784    | Frisian    | J2b2-M241    | yes                | 39,9                                                 | 10                                | 110                                   | 176                                      |
| fri-1788    | Frisian    | R1b1b2-L11   | yes                | 43,9                                                 | 11                                | 12                                    | 174                                      |
| fri-1937    | Frisian    | I1-M253      | yes                | 48,9                                                 | 8                                 | 8                                     | 182                                      |
| fri-1938    | Frisian    | I1-M253      | yes                | 47,7                                                 | 4                                 | 5                                     | 182                                      |
| gre-1       | Greek      | I2a-P37.2    | yes                | 51,0                                                 | 7                                 | 7                                     | 175                                      |
| gre-10      | Greek      | R1b1b2-M269  | yes                | 55,2                                                 | 15                                | 15                                    | 174                                      |
| gre-11      | Greek      | J2a-M410     | yes                | 51,4                                                 | 36                                | 37                                    | 182                                      |
| gre-12      | Greek      | T-L131       | yes                | 40,3                                                 | 10                                | 117                                   | 174                                      |
| gre-15      | Greek      | R1a-M198     | yes                | 46,3                                                 | 7                                 | 56                                    | 173                                      |
| gre-17      | Greek      | E1b1b1c-M123 | yes                | 52,7                                                 | 35                                | 66                                    | 195                                      |
| gre-2       | Greek      | J2b2-M241    | yes                | 47,4                                                 | 16                                | 44                                    | 177                                      |
| gre-3       | Greek      | J2b1-M205    | yes                | 43,7                                                 | 17                                | 48                                    | 181                                      |
| gre-4       | Greek      | I2a-P37.2    | yes                | 49,2                                                 | 12                                | 53                                    | 171                                      |
| gre-5       | Greek      | I2a-P37.2    | yes                | 41,5                                                 | 5                                 | 5                                     | 171                                      |
| gre-77      | Greek      | J2a2-M67     | yes                | 51,9                                                 | 34                                | 40                                    | 185                                      |
| gre-78      | Greek      | E1b1ba2-V13  | yes                | 48,2                                                 | 8                                 | 8                                     | 189                                      |
| gre-79      | Greek      | J2a-M410     | yes                | 51,1                                                 | 40                                | 41                                    | 187                                      |
| gre-80      | Greek      | R1b1b2-M269  | yes                | 56,8                                                 | 13                                | 13                                    | 172                                      |
| gre-82      | Greek      | I2a-P37.2    | yes                | 42,0                                                 | 8                                 | 8                                     | 175                                      |
| gre-83m     | Greek      | E1b1ba2-V13  | yes                | 61,1                                                 | 8                                 | 8                                     | 189                                      |
| gre-84m     | Greek      | I2a-P37.2    | yes                | 52,2                                                 | 6                                 | 6                                     | 173                                      |
| gre-85m     | Greek      | J2a-M410     | yes                | 51,4                                                 | 16                                | 63                                    | 209                                      |
| gre-86      | Greek      | I2a-P37.2    | yes                | 53,2                                                 | 5                                 | 5                                     | 170                                      |
| gre-87      | Greek      | I2b-P214     | yes                | 43,3                                                 | 31                                | 73                                    | 187                                      |
| hun-1       | Hungarian  | I2a-P37.2    | yes                | 44,2                                                 | 1                                 | 1                                     | 168                                      |
| hun-2       | Hungarian  | R1b1b2-S116  | yes                | 51,2                                                 | 11                                | 11                                    | 174                                      |
| hun-25      | Hungarian  | R1a-M198     | yes                | 61,0                                                 | 4                                 | 18                                    | 188                                      |
| hun-26      | Hungarian  | R1b1b2-S116  | yes                | 58,7                                                 | 9                                 | 11                                    | 174                                      |
| hun-27      | Hungarian  | I1-M253      | yes                | 57,7                                                 | 10                                | 11                                    | 179                                      |
| hun-28      | Hungarian  | R1a-M198     | yes                | 59,4                                                 | 5                                 | 5                                     | 180                                      |
| hun-29      | Hungarian  | G2a-L31      | yes                | 49,4                                                 | 30                                | 34                                    | 189                                      |
| hun-3       | Hungarian  | R1b1b2-M269  | yes                | 63,7                                                 | 3                                 | 16                                    | 175                                      |

| Sample name | Population | Haplogroup  | In final analysis? | Mean raw coverage in final analysed regions (3.72Mb) | No. of singletons (whole dataset) | No. of singletons (within-population) | Total mutations from root (as in Fig. 1) |
|-------------|------------|-------------|--------------------|------------------------------------------------------|-----------------------------------|---------------------------------------|------------------------------------------|
| hun-33      | Hungarian  | R1b1b2-M269 | yes                | 52,6                                                 | 11                                | 13                                    | 170                                      |
| hun-34      | Hungarian  | R1b1b2-M269 | yes                | 47,8                                                 | 10                                | 11                                    | 170                                      |
| hun-35      | Hungarian  | R1a-M198    | yes                | 59,7                                                 | 4                                 | 4                                     | 179                                      |
| hun-37      | Hungarian  | I1-M253     | yes                | 68,4                                                 | 15                                | 17                                    | 185                                      |
| hun-38      | Hungarian  | R1a-M198    | yes                | 69,7                                                 | 4                                 | 12                                    | 179                                      |
| hun-39      | Hungarian  | R1a-M198    | yes                | 44,6                                                 | 6                                 | 7                                     | 173                                      |
| hun-40      | Hungarian  | R1b1b2-L11  | yes                | 56,2                                                 | 7                                 | 13                                    | 178                                      |
| hun-43      | Hungarian  | R1a-M198    | yes                | 70,4                                                 | 17                                | 18                                    | 185                                      |
| hun-46      | Hungarian  | R1b1b2-L11  | yes                | 58,7                                                 | 9                                 | 14                                    | 179                                      |
| hun-47      | Hungarian  | G2a-L31     | yes                | 66,8                                                 | 18                                | 37                                    | 192                                      |
| hun-5       | Hungarian  | I2-P125     | yes                | 48,0                                                 | 40                                | 57                                    | 171                                      |
| hun-9       | Hungarian  | I2a-P37.2   | yes                | 49,4                                                 | 9                                 | 9                                     | 176                                      |
| ire-0052    | Irish      | R1b1b2-M222 | yes                | 51,3                                                 | 1                                 | 1                                     | 177                                      |
| ire-0053    | Irish      | R1b1b2-M222 | yes                | 66,1                                                 | 5                                 | 5                                     | 181                                      |
| ire-0059    | Irish      | R1b1b2-S116 | yes                | 70,0                                                 | 19                                | 19                                    | 184                                      |
| ire-0068    | Irish      | R1b1b2-M222 | yes                | 46,9                                                 | 7                                 | 7                                     | 182                                      |
| ire-0078    | Irish      | R1b1b2-S116 | yes                | 32,4                                                 | 6                                 | 6                                     | 169                                      |
| ire-0093    | Irish      | G1-M285     | yes                | 60,3                                                 | 10                                | 116                                   | 164                                      |
| ire-0095    | Irish      | I2a-P37.2   | yes                | 43,0                                                 | 19                                | 19                                    | 168                                      |
| ire-0100    | Irish      | R1b1b2-M222 | yes                | 55,0                                                 | 2                                 | 3                                     | 177                                      |
| ire-0107    | Irish      | R1b1b2-S116 | yes                | 55,0                                                 | 2                                 | 3                                     | 175                                      |
| ire-0109    | Irish      | R1b1b2-S116 | yes                | 37,5                                                 | 7                                 | 7                                     | 179                                      |
| ire-0114    | Irish      | I2b-P214    | yes                | 52,5                                                 | 56                                | 74                                    | 188                                      |
| ire-0116    | Irish      | R1b1b2-S116 | yes                | 43,7                                                 | 9                                 | 9                                     | 172                                      |
| ire-0120    | Irish      | R1b1b2-S116 | yes                | 61,3                                                 | 16                                | 16                                    | 179                                      |
| ire-0130    | Irish      | I1-M253     | yes                | 49,8                                                 | 9                                 | 82                                    | 185                                      |
| ire-0136    | Irish      | R1b1b2-S116 | yes                | 54,1                                                 | 14                                | 14                                    | 179                                      |
| ire-112     | Irish      | R1b1b2-S116 | yes                | 73,8                                                 | 13                                | 13                                    | 176                                      |
| ire-132     | Irish      | R1b1b2-S116 | yes                | 80,4                                                 | 4                                 | 9                                     | 172                                      |
| ire-55      | Irish      | R1b1b2-M222 | yes                | 59,6                                                 | 2                                 | 2                                     | 175                                      |
| ire-74      | Irish      | R1b1b2-S116 | yes                | 52,7                                                 | 5                                 | 5                                     | 169                                      |
| ire-94      | Irish      | I2a-P37.2   | yes                | 53,4                                                 | 26                                | 27                                    | 176                                      |
| nor-13      | Norwegian  | N1c1-M178   | yes                | 54,9                                                 | 1                                 | 120                                   | 178                                      |
| nor-14      | Norwegian  | I1-M253     | yes                | 55,9                                                 | 9                                 | 10                                    | 178                                      |
| nor-15      | Norwegian  | I1-M253     | yes                | 55,0                                                 | 17                                | 17                                    | 185                                      |
| nor-16      | Norwegian  | R1a-M198    | yes                | 64,8                                                 | 9                                 | 13                                    | 178                                      |
| nor-17      | Norwegian  | I2b-P214    | yes                | 47,5                                                 | 11                                | 83                                    | 186                                      |
| nor-18      | Norwegian  | E1b1ba2-V13 | yes                | 45,7                                                 | 10                                | 241                                   | 191                                      |

| Sample name | Population  | Haplogroup  | In final analysis? | Mean raw coverage in final analysed regions (3.72Mb) | No. of singletons (whole dataset) | No. of singletons (within-population) | Total mutations from root (as in Fig. 1) |
|-------------|-------------|-------------|--------------------|------------------------------------------------------|-----------------------------------|---------------------------------------|------------------------------------------|
| nor-2       | Norwegian   | I1-M253     | yes                | 57,1                                                 | 7                                 | 7                                     | 180                                      |
| nor-20      | Norwegian   | I1-M253     | yes                | 48,6                                                 | 15                                | 16                                    | 184                                      |
| nor-21      | Norwegian   | I1-M253     | yes                | 56,5                                                 | 2                                 | 8                                     | 181                                      |
| nor-23      | Norwegian   | R1a-M198    | yes                | 43,0                                                 | 6                                 | 6                                     | 177                                      |
| nor-24      | Norwegian   | R1b1b2-S116 | yes                | 48,9                                                 | 12                                | 13                                    | 176                                      |
| nor-25      | Norwegian   | R1b1b2-S116 | yes                | 51,3                                                 | 6                                 | 6                                     | 175                                      |
| nor-26      | Norwegian   | R1a-M198    | yes                | 66,3                                                 | 5                                 | 5                                     | 176                                      |
| nor-27      | Norwegian   | R1b1b2-U198 | yes                | 61,1                                                 | 4                                 | 8                                     | 170                                      |
| nor-28      | Norwegian   | R1b1b2-S116 | yes                | 55,1                                                 | 9                                 | 9                                     | 172                                      |
| nor-29      | Norwegian   | R1b1b2-M222 | yes                | 50,8                                                 | 2                                 | 12                                    | 175                                      |
| nor-3       | Norwegian   | R1b1b2-S116 | yes                | 58,8                                                 | 4                                 | 4                                     | 173                                      |
| nor-7       | Norwegian   | I1-M253     | yes                | 56,6                                                 | 14                                | 16                                    | 184                                      |
| nor-8       | Norwegian   | R1b1b2-S116 | yes                | 38,7                                                 | 7                                 | 9                                     | 172                                      |
| nor-9       | Norwegian   | R1b1b2-S116 | yes                | 46,6                                                 | 3                                 | 3                                     | 172                                      |
| ork-004     | Orcadian    | R1b1b2-Z18  | yes                | 42,0                                                 | 2                                 | 4                                     | 167                                      |
| ork-007     | Orcadian    | R1b1b2-S116 | yes                | 50,8                                                 | 9                                 | 9                                     | 172                                      |
| ork-008     | Orcadian    | R1b1b2-L11  | yes                | 45,3                                                 | 11                                | 17                                    | 179                                      |
| ork-010     | Orcadian    | R1a-M198    | yes                | 33,0                                                 | 3                                 | 3                                     | 181                                      |
| ork-022m    | Orcadian    | R1b1b2-S116 | yes                | 52,6                                                 | 9                                 | 9                                     | 172                                      |
| ork-026m    | Orcadian    | R1a-M198    | yes                | 43,4                                                 | 12                                | 13                                    | 169                                      |
| ork-036m    | Orcadian    | R1a-M198    | yes                | 50,2                                                 | 9                                 | 13                                    | 181                                      |
| ork-525     | Orcadian    | I1-M253     | yes                | 33,5                                                 | 2                                 | 2                                     | 170                                      |
| ork-552     | Orcadian    | R1b1b2-S116 | yes                | 35,3                                                 | 11                                | 11                                    | 174                                      |
| ork-564     | Orcadian    | R1b1b2-Z18  | yes                | 42,7                                                 | 4                                 | 4                                     | 167                                      |
| ork-565     | Orcadian    | R1a-M198    | yes                | 38,5                                                 | 12                                | 12                                    | 180                                      |
| ork-567     | Orcadian    | R1b1b2-S116 | yes                | 46,9                                                 | 7                                 | 13                                    | 177                                      |
| ork-571     | Orcadian    | R1b1b2-S116 | yes                | 49,1                                                 | 4                                 | 8                                     | 171                                      |
| ork-573     | Orcadian    | I1-M253     | yes                | 46,3                                                 | 1                                 | 8                                     | 176                                      |
| ork-575     | Orcadian    | R1b1b2-S116 | yes                | 57,5                                                 | 8                                 | 8                                     | 172                                      |
| ork-577     | Orcadian    | R1b1b2-S116 | yes                | 44,9                                                 | 15                                | 15                                    | 178                                      |
| ork-579     | Orcadian    | R1a-M198    | yes                | 44,7                                                 | 6                                 | 6                                     | 182                                      |
| ork-583     | Orcadian    | R1a-M198    | yes                | 44,7                                                 | 0                                 | 0                                     | 178                                      |
| ork-584     | Orcadian    | R1b1b2-S116 | yes                | 50,6                                                 | 8                                 | 8                                     | 171                                      |
| ork-585     | Orcadian    | R1b1b2-S116 | yes                | 32,6                                                 | 12                                | 12                                    | 175                                      |
| pal-4918    | Palestinian | G2a-L31     | yes                | 41,8                                                 | 0                                 | 0                                     | 198                                      |
| pal-4919    | Palestinian | G2a-L31     | yes                | 51,3                                                 | 1                                 | 1                                     | 199                                      |
| pal-4921    | Palestinian | G2a-L31     | yes                | 48,9                                                 | 0                                 | 0                                     | 194                                      |
| pal-4922    | Palestinian | G2a-L31     | yes                | 35,6                                                 | 2                                 | 2                                     | 196                                      |



| Sample name | Population  | Haplogroup   | In final analysis? | Mean raw coverage in final analysed regions (3.72Mb) | No. of singletons (whole dataset) | No. of singletons (within-population) | Total mutations from root (as in Fig. 1) |
|-------------|-------------|--------------|--------------------|------------------------------------------------------|-----------------------------------|---------------------------------------|------------------------------------------|
| pal-4929    | Palestinian | E1b1ba3-V22  | yes                | 53,9                                                 | 22                                | 130                                   | 202                                      |
| pal-4940    | Palestinian | G2a-L31      | yes                | 55,4                                                 | 3                                 | 3                                     | 196                                      |
| pal-4941    | Palestinian | G2a-L31      | yes                | 42,4                                                 | 1                                 | 1                                     | 195                                      |
| pal-4942    | Palestinian | G2a-L31      | yes                | 70,6                                                 | 1                                 | 1                                     | 196                                      |
| pal-4943    | Palestinian | G2a-L31      | yes                | 59,0                                                 | 0                                 | 0                                     | 195                                      |
| pal-4947    | Palestinian | G2a-L31      | yes                | 68,0                                                 | 2                                 | 2                                     | 196                                      |
| pal-5047    | Palestinian | G2a-L31      | yes                | 48,2                                                 | 3                                 | 3                                     | 196                                      |
| pal-5048    | Palestinian | G2a-L31      | yes                | 52,7                                                 | 0                                 | 0                                     | 195                                      |
| pal-5225    | Palestinian | E1b1a1-M58   | yes                | 59,8                                                 | 0                                 | 0                                     | 178                                      |
| pal-5232    | Palestinian | J2b1-M205    | yes                | 50,5                                                 | 17                                | 76                                    | 182                                      |
| pal-5257    | Palestinian | J2a-M410     | yes                | 51,1                                                 | 39                                | 77                                    | 183                                      |
| pal-5341    | Palestinian | E1b1a1-M58   | yes                | 45,6                                                 | 0                                 | 0                                     | 178                                      |
| pal-5365    | Palestinian | E1b1a8a-U175 | yes                | 85,2                                                 | 21                                | 22                                    | 181                                      |
| pal-5366    | Palestinian | T-P322       | yes                | 57,4                                                 | 41                                | 145                                   | 195                                      |
| pal-5370    | Palestinian | excluded     | no, missing data   | 3,6                                                  | n/a                               | n/a                                   | n/a                                      |
| pal-5420    | Palestinian | J1e-P58      | yes                | 51,6                                                 | 6                                 | 90                                    | 189                                      |
| saa-1       | Saami       | R1a-M198     | yes                | 48,8                                                 | 11                                | 121                                   | 179                                      |
| saa-10      | Saami       | I1-M253      | yes                | 55,5                                                 | 0                                 | 0                                     | 181                                      |
| saa-11      | Saami       | I1-M253      | yes                | 63,8                                                 | 1                                 | 1                                     | 183                                      |
| saa-12      | Saami       | N1c1-M178    | yes                | 63,7                                                 | 0                                 | 0                                     | 184                                      |
| saa-13      | Saami       | N1c1-M178    | yes                | 52,8                                                 | 4                                 | 4                                     | 185                                      |
| saa-14      | Saami       | I1-M253      | yes                | 53,3                                                 | 9                                 | 10                                    | 179                                      |
| saa-15      | Saami       | N1c1-M178    | yes                | 46,7                                                 | 1                                 | 1                                     | 185                                      |
| saa-16      | Saami       | N1c1-M178    | yes                | 50,8                                                 | 0                                 | 0                                     | 184                                      |
| saa-17      | Saami       | N1c1-M178    | yes                | 68,0                                                 | 6                                 | 6                                     | 181                                      |
| saa-18      | Saami       | N1c1-M178    | yes                | 71,5                                                 | 0                                 | 0                                     | 181                                      |
| saa-19      | Saami       | I1-M253      | yes                | 43,8                                                 | 0                                 | 0                                     | 182                                      |
| saa-2       | Saami       | N1c1-M178    | yes                | 52,1                                                 | 1                                 | 1                                     | 182                                      |
| saa-20      | Saami       | I1-M253      | yes                | 32,2                                                 | 1                                 | 1                                     | 183                                      |
| saa-3       | Saami       | N1c1-M178    | yes                | 53,6                                                 | 5                                 | 5                                     | 183                                      |
| saa-4       | Saami       | excluded     | no, missing data   | 0,9                                                  | n/a                               | n/a                                   | n/a                                      |
| saa-5       | Saami       | I1-M253      | yes                | 39,4                                                 | 1                                 | 1                                     | 182                                      |
| saa-6       | Saami       | N1c1-M178    | yes                | 56,8                                                 | 4                                 | 4                                     | 185                                      |
| saa-7       | Saami       | N1c1-M178    | yes                | 54,7                                                 | 0                                 | 0                                     | 181                                      |
| saa-8       | Saami       | N1c1-M178    | yes                | 49,7                                                 | 1                                 | 1                                     | 185                                      |
| saa-9       | Saami       | I1-M253      | yes                | 55,4                                                 | 0                                 | 0                                     | 181                                      |
| ser-1       | Serbian     | I1-M253      | yes                | 42,5                                                 | 8                                 | 8                                     | 177                                      |
| ser-12      | Serbian     | I1-M253      | yes                | 45,8                                                 | 10                                | 11                                    | 180                                      |

| Sample name | Population | Haplogroup  | In final analysis? | Mean raw coverage in final analysed regions (3.72Mb) | No. of singletons (whole dataset) | No. of singletons (within-population) | Total mutations from root (as in Fig. 1) |
|-------------|------------|-------------|--------------------|------------------------------------------------------|-----------------------------------|---------------------------------------|------------------------------------------|
| ser-13      | Serbian    | J2b2-M241   | yes                | 41,3                                                 | 6                                 | 6                                     | 171                                      |
| ser-16      | Serbian    | I2a-P37.2   | yes                | 44,0                                                 | 6                                 | 6                                     | 173                                      |
| ser-19      | Serbian    | R1a-M198    | yes                | 47,3                                                 | 10                                | 11                                    | 191                                      |
| ser-2       | Serbian    | E1b1ba2-V13 | yes                | 47,6                                                 | 13                                | 13                                    | 194                                      |
| ser-20      | Serbian    | I2a-P37.2   | yes                | 52,1                                                 | 3                                 | 4                                     | 170                                      |
| ser-21      | Serbian    | I2a-P37.2   | yes                | 44,2                                                 | 7                                 | 7                                     | 174                                      |
| ser-23      | Serbian    | I1-M253     | yes                | 55,3                                                 | 1                                 | 1                                     | 175                                      |
| ser-24      | Serbian    | excluded    | no, missing data   | 68,4                                                 | n/a                               | n/a                                   | n/a                                      |
| ser-26      | Serbian    | E1b1ba2-V13 | yes                | 57,3                                                 | 8                                 | 8                                     | 189                                      |
| ser-27      | Serbian    | R1a-M198    | yes                | 45,4                                                 | 5                                 | 9                                     | 189                                      |
| ser-28      | Serbian    | I2a-P37.2   | yes                | 60,9                                                 | 0                                 | 0                                     | 167                                      |
| ser-3       | Serbian    | T-L208      | yes                | 42,5                                                 | 49                                | 135                                   | 192                                      |
| ser-30      | Serbian    | I1-M253     | yes                | 61,8                                                 | 3                                 | 3                                     | 177                                      |
| ser-4       | Serbian    | I1-M253     | yes                | 44,7                                                 | 13                                | 13                                    | 182                                      |
| ser-5       | Serbian    | R1b1b2-S116 | yes                | 40,7                                                 | 9                                 | 15                                    | 172                                      |
| ser-6       | Serbian    | I2a-P37.2   | yes                | 48,0                                                 | 9                                 | 9                                     | 174                                      |
| ser-7       | Serbian    | R1b1b2-M269 | yes                | 48,5                                                 | 10                                | 16                                    | 173                                      |
| ser-9       | Serbian    | J2b2-M241   | yes                | 49,0                                                 | 8                                 | 8                                     | 173                                      |
| spa-14      | Spanish    | J2a2-M67    | yes                | 60,4                                                 | 9                                 | 34                                    | 180                                      |
| spa-15      | Spanish    | J2a-M410    | yes                | 60,0                                                 | 43                                | 44                                    | 190                                      |
| spa-2       | Spanish    | R1b1b2-S116 | yes                | 53,3                                                 | 15                                | 15                                    | 178                                      |
| spa-20      | Spanish    | E1b1b-M215  | yes                | 50,2                                                 | 34                                | 35                                    | 197                                      |
| spa-22      | Spanish    | R1b1b2-S116 | yes                | 64,9                                                 | 8                                 | 8                                     | 172                                      |
| spa-25      | Spanish    | R1b1b2-S116 | yes                | 50,7                                                 | 8                                 | 8                                     | 171                                      |
| spa-26u     | Spanish    | R1b1b2-M269 | yes                | 43,4                                                 | 22                                | 24                                    | 181                                      |
| spa-31      | Spanish    | R1b1b2-S116 | yes                | 51,1                                                 | 9                                 | 9                                     | 173                                      |
| spa-32      | Spanish    | E1b1b1b-M81 | yes                | 57,0                                                 | 31                                | 31                                    | 193                                      |
| spa-37      | Spanish    | R1b1b2-S116 | yes                | 58,7                                                 | 14                                | 14                                    | 177                                      |
| spa-40      | Spanish    | R1b1b2-M269 | yes                | 51,8                                                 | 20                                | 25                                    | 182                                      |
| spa-41      | Spanish    | R1b1b2-S116 | yes                | 49,5                                                 | 13                                | 13                                    | 176                                      |
| spa-47      | Spanish    | R1b1b2-S116 | yes                | 56,4                                                 | 13                                | 13                                    | 176                                      |
| spa-51      | Spanish    | excluded    | no, female         | 0,3                                                  | n/a                               | n/a                                   | n/a                                      |
| spa-53      | Spanish    | R1b1b2-S116 | yes                | 43,7                                                 | 8                                 | 10                                    | 174                                      |
| spa-54u     | Spanish    | R1b1b2-S116 | yes                | 46,9                                                 | 6                                 | 7                                     | 170                                      |
| spa-60      | Spanish    | R1b1b2-S116 | yes                | 42,9                                                 | 19                                | 19                                    | 182                                      |
| spa-60u     | Spanish    | R1b1b2-S116 | yes                | 55,5                                                 | 9                                 | 16                                    | 180                                      |
| spa-62      | Spanish    | E1b1ba3-V22 | yes                | 56,6                                                 | 15                                | 66                                    | 194                                      |
| spa-63      | Spanish    | R1b1b2-S116 | yes                | 47,6                                                 | 14                                | 14                                    | 177                                      |

| Sample name | Population    | Haplogroup  | In final analysis? | Mean raw coverage in final analysed regions (3.72Mb) | No. of singletons (whole dataset) | No. of singletons (within-population) | Total mutations from root (as in Fig. 1) |
|-------------|---------------|-------------|--------------------|------------------------------------------------------|-----------------------------------|---------------------------------------|------------------------------------------|
| TSI-NA20510 | Italian (TSI) | E1b1ba2-V13 | yes                | 50,9                                                 | 11                                | 241                                   | 192                                      |
| TSI-NA20538 | Italian (TSI) | R1b1b2-S116 | yes                | 53,3                                                 | 5                                 | 5                                     | 180                                      |
| TSI-NA20543 | Italian (TSI) | J1e-P58     | yes                | 58,8                                                 | 12                                | 95                                    | 194                                      |
| TSI-NA20581 | Italian (TSI) | R1b1b2-S116 | yes                | 55,3                                                 | 12                                | 12                                    | 175                                      |
| TSI-NA20586 | Italian (TSI) | R1b1b2-L11  | yes                | 59,7                                                 | 1                                 | 12                                    | 174                                      |
| TSI-NA20588 | Italian (TSI) | J2b-M102    | yes                | 54,9                                                 | 34                                | 63                                    | 169                                      |
| TSI-NA20752 | Italian (TSI) | R1b1b2-S116 | yes                | 52,9                                                 | 11                                | 14                                    | 177                                      |
| TSI-NA20758 | Italian (TSI) | T-L131      | yes                | 50,3                                                 | 9                                 | 116                                   | 173                                      |
| TSI-NA20759 | Italian (TSI) | R1b1b2-S116 | yes                | 46,7                                                 | 7                                 | 9                                     | 172                                      |
| TSI-NA20765 | Italian (TSI) | J2a2-M67    | yes                | 52,7                                                 | 23                                | 23                                    | 184                                      |
| TSI-NA20783 | Italian (TSI) | R1b1b2-S116 | yes                | 58,5                                                 | 11                                | 11                                    | 174                                      |
| TSI-NA20785 | Italian (TSI) | R1b1b2-M269 | yes                | 48,9                                                 | 12                                | 14                                    | 171                                      |
| TSI-NA20792 | Italian (TSI) | R1b1b2-S116 | yes                | 51,0                                                 | 12                                | 12                                    | 175                                      |
| TSI-NA20796 | Italian (TSI) | R1a-M198    | yes                | 46,0                                                 | 12                                | 61                                    | 178                                      |
| TSI-NA20798 | Italian (TSI) | R1b1b2-S116 | yes                | 46,4                                                 | 0                                 | 0                                     | 178                                      |
| TSI-NA20803 | Italian (TSI) | R1b1b2-S116 | yes                | 54,4                                                 | 0                                 | 0                                     | 178                                      |
| TSI-NA20805 | Italian (TSI) | J2a-M410    | yes                | 36,6                                                 | 13                                | 62                                    | 206                                      |
| TSI-NA20806 | Italian (TSI) | R1b1b2-S116 | yes                | 42,2                                                 | 2                                 | 2                                     | 176                                      |
| TSI-NA20810 | Italian (TSI) | R1b1b2-S116 | yes                | 47,1                                                 | 9                                 | 9                                     | 172                                      |
| TSI-NA20815 | Italian (TSI) | J2a2-M67    | yes                | 50,9                                                 | 22                                | 22                                    | 183                                      |
| tur-1       | Turkish       | G2a-L31     | yes                | 38,7                                                 | 49                                | 49                                    | 181                                      |
| tur-10      | Turkish       | J2a-M410    | yes                | 44,1                                                 | 14                                | 14                                    | 207                                      |
| tur-11      | Turkish       | R1b1b2-M269 | yes                | 50,4                                                 | 14                                | 56                                    | 173                                      |
| tur-12      | Turkish       | J2b1-M205   | yes                | 44,2                                                 | 10                                | 69                                    | 175                                      |
| tur-13      | Turkish       | J2a-M410    | yes                | 46,9                                                 | 59                                | 60                                    | 193                                      |
| tur-14      | Turkish       | J2a2-M67    | yes                | 53,3                                                 | 37                                | 37                                    | 188                                      |
| tur-15      | Turkish       | N1c1-M178   | yes                | 38,5                                                 | 17                                | 124                                   | 182                                      |
| tur-16      | Turkish       | J-M304      | yes                | 54,8                                                 | 58                                | 58                                    | 200                                      |
| tur-17      | Turkish       | R1a-M198    | yes                | 50,0                                                 | 5                                 | 63                                    | 180                                      |
| tur-18      | Turkish       | L3-M357     | yes                | 56,8                                                 | 53                                | 54                                    | 184                                      |
| tur-19      | Turkish       | L-M11       | yes                | 45,3                                                 | 6                                 | 6                                     | 173                                      |
| tur-2       | Turkish       | G2a-L31     | yes                | 50,1                                                 | 25                                | 51                                    | 184                                      |
| tur-21      | Turkish       | J2a2-M67    | yes                | 44,9                                                 | 8                                 | 28                                    | 179                                      |
| tur-3       | Turkish       | J2a-M410    | yes                | 56,1                                                 | 12                                | 12                                    | 205                                      |
| tur-4       | Turkish       | E1b1b-M215  | yes                | 52,6                                                 | 39                                | 247                                   | 198                                      |
| tur-5       | Turkish       | I2-P125     | yes                | 57,1                                                 | 60                                | 125                                   | 191                                      |
| tur-6       | Turkish       | J1e-P58     | yes                | 56,4                                                 | 12                                | 51                                    | 193                                      |
| tur-7       | Turkish       | J2a-M410    | yes                | 52,6                                                 | 46                                | 49                                    | 194                                      |

| <b>Sample name</b> | <b>Population</b> | <b>Haplogroup</b> | <b>In final analysis?</b> | <b>Mean raw coverage in final analysed regions (3.72Mb)</b> | <b>No. of singletons (whole dataset)</b> | <b>No. of singletons (within-population)</b> | <b>Total mutations from root (as in Fig. 1)</b> |
|--------------------|-------------------|-------------------|---------------------------|-------------------------------------------------------------|------------------------------------------|----------------------------------------------|-------------------------------------------------|
| tur-8              | Turkish           | H1-M52            | yes                       | 53,7                                                        | 128                                      | 128                                          | 177                                             |
| tur-9              | Turkish           | L-M11             | yes                       | 53,6                                                        | 10                                       | 10                                           | 177                                             |

**Supplementary Table 2. Variant validation summary.**

| Comparison                   | No. of overlapping samples | No. of overlapping sites | No. of calls compared | No of. FP/FN calls (%)  | No. of sites with false calls |
|------------------------------|----------------------------|--------------------------|-----------------------|-------------------------|-------------------------------|
| Our data vs CompleteGenomics | 4                          | 888                      | 3542                  | 0 (0%)/ 0 (0%)          | 0                             |
| Our data vs OMNI 2.5         | 39                         | 241                      | 6916                  | 9 (0.13%)/ 126 (1.82%)  | 19                            |
| CompleteGenomics vs OMNI 2.5 | 49                         | 263                      | 5258                  | 150 (2.85%)/ 124 (2.36) | 30                            |

**Supplementary Table 3. Correlation among latitude, longitude and diversity measures**

| Comparison                                             | Test     | All 17 populations |              | 13 populations showing recent expansion BSPs |              |
|--------------------------------------------------------|----------|--------------------|--------------|----------------------------------------------|--------------|
|                                                        |          | R                  | p-value      | R                                            | p-value      |
| median no. of singletons vs latitude                   | Pearson  | -0,407             | 0,105        | -0,311                                       | 0,302        |
|                                                        | Spearman | -0,393             | 0,118        | -0,299                                       | 0,321        |
| median no. of singletons vs longitude                  | Pearson  | 0,349              | 0,17         | 0,107                                        | 0,727        |
|                                                        | Spearman | 0,034              | 0,898        | 0,065                                        | 0,833        |
| sd of no. of singletons vs latitude                    | Pearson  | -0,2               | 0,441        | 0,016                                        | 0,959        |
|                                                        | Spearman | -0,216             | 0,405        | -0,132                                       | 0,667        |
| sd of no. of singletons vs longitude                   | Pearson  | 0,319              | 0,212        | 0,206                                        | 0,499        |
|                                                        | Spearman | 0,296              | 0,25         | 0,261                                        | 0,388        |
| S vs latitude                                          | Pearson  | -0,627             | <b>0,007</b> | -0,351                                       | 0,239        |
|                                                        | Spearman | -0,713             | <b>0,001</b> | -0,413                                       | 0,161        |
| S vs longitude                                         | Pearson  | 0,601              | <b>0,011</b> | 0,583                                        | <b>0,036</b> |
|                                                        | Spearman | 0,529              | <b>0,029</b> | 0,564                                        | <b>0,045</b> |
| Age of minimum Ne before recent expansion vs latitude  | Pearson  | nd                 | nd           | 0,035                                        | 0,909        |
|                                                        | Spearman | nd                 | nd           | -0,063                                       | 0,837        |
| Age of minimum Ne before recent expansion vs longitude | Pearson  | nd                 | nd           | -0,179                                       | 0,558        |
|                                                        | Spearman | nd                 | nd           | -0,044                                       | 0,887        |

nd: not determined

**Supplementary Table 4. Times at which effective population sizes were at a minimum prior to expansion.**

| <b>Population</b> | <b>Time (95% CI)/Y</b> |
|-------------------|------------------------|
| bas               | 3023 (2773-3285)       |
| bav               | 3424 (3141-3719)       |
| CEU               | 3825 (3510-4160)       |
| den               | 3639 (3337-4029)       |
| eng               | 3245 (2979-3529)       |
| fri               | 3452 (3168-3752)       |
| hun               | 3728 (3422-4054)       |
| ire               | 3471 (3183-3774)       |
| nor               | 3280 (3008-3563)       |
| ork               | 2862 (2687-3110)       |
| ser               | 2287 (2098-2486)       |
| spa               | 3630 (3331-3945)       |
| TSI               | 3293 (3021-3579)       |

Population abbreviations are as in Figure 1. CI: confidence interval; Y: years.

**Supplementary Table 5. ABC proportion of true and false positives** based on 1,000 PODS simulated under each model.

| <b>Simulated model</b> | <b>True positives</b> | <b>False positives</b> |
|------------------------|-----------------------|------------------------|
| M1                     | 0.744                 | 0.062                  |
| M2                     | 0.581                 | 0.089                  |
| M3                     | 0.481                 | 0.114                  |
| M4                     | 0.738                 | 0.074                  |
| M5                     | 0.701                 | 0.101                  |
| M2+M3                  | 0.796                 | 0.047                  |
| M4+M5                  | 0.937                 | 0.044                  |

The constant population model (M1) has a proportion of true positives over 70%, while for the other models the proportion of true positives ranges from 48% (M3) to 74% (M4). This may be due to the high similarity between M2 and M3 and between M4 and M5, making it difficult to distinguish between these pairs of models. For this reason, we also calculate the proportion of true and false positives combining models sharing the same ancient demographic event i.e. reduction (M2+M3) or expansion (M4+M5), reaching a high proportion of true positives, of 80% and 94% respectively. To estimate posterior probabilities (Supplementary Table 6) we use M1 plus the combined models.



**Supplementary Table 6. Posterior probabilities of the models computed for each population based on the multinomial logistic regression approach with 50,000 retained simulations.**

| Population | Models<br>M1 | M2+M3       | M4+M5       | Skyline |
|------------|--------------|-------------|-------------|---------|
| bas        | 0.05         | <b>0.75</b> | 0.20        |         |
| bav        | 0.15         | 0.12        | <b>0.73</b> | *       |
| CEU        | 0.04         | 0.57        | 0.49        |         |
| den        | 0.06         | 0.56        | 0.38        |         |
| eng        | 0.01         | 0.06        | <b>0.93</b> | *       |
| fri        | 0.04         | <b>0.75</b> | 0.21        |         |
| gre        | 0.14         | 0.13        | <b>0.73</b> | *       |
| hun        | 0.10         | 0.30        | 0.60        |         |
| ire        | 0.02         | 0.54        | 0.44        |         |
| nor        | 0.07         | 0.64        | 0.29        |         |
| ork        | 0.08         | 0.56        | 0.36        |         |
| pal        | 0.11         | 0.31        | 0.58        |         |
| saa        | 0.03         | <b>0.85</b> | 0.12        | *       |
| ser        | 0.18         | 0.50        | 0.32        |         |
| spa        | 0.09         | 0.18        | <b>0.73</b> | *       |
| TSI        | 0.05         | 0.39        | 0.56        |         |
| tur        | 0.14         | 0.06        | <b>0.80</b> | *       |

Bold text indicates models with high support ( $P > 0.7$ ). The “Skyline” column indicates the presence of agreement (\*) between the ABC confidently selected model and the skyline reconstruction.

In all 17 populations, M1 is never selected as the best model, with posterior probabilities ranging from 1% (eng) to 18% (ser). In most cases in which we obtain a clear support (above 70%, shown in bold) for the reduction (M2+M3) or the expansion (M4+M5) models, the ABC results agree with the Bayesian Skyline analysis. For some populations the posterior probability of the selected model is very high (93% for eng or 85% for saa). In some cases we are not able to confidently assign a support to a specific demography, with highest probabilities of about 50%.

**Supplementary Table 7. Estimated parameters from Approximate Bayesian Computation for those populations showing a clear support for a specific demography.**

| Population | Model | Parameter | Median | 2.5% CI | 97.5% CI | R <sup>2</sup> |
|------------|-------|-----------|--------|---------|----------|----------------|
| saa        | M2    | NA        | 4661   | 1169    | 17403    | 0.29           |
|            |       | NC        | 269    | 64      | 870      | 0.15           |
|            |       | T2        | 510    | 30      | 877      | 0.00*          |
|            |       | T1        | 12475  | 1841    | 19265    | 0.13           |
| bas        | M2    | NA        | 3398   | 1134    | 15556    | 0.29           |
|            |       | NC        | 388    | 87      | 955      | 0.14           |
|            |       | T2        | 486    | 30      | 874      | 0.00*          |
|            |       | T1        | 12332  | 1584    | 19256    | 0.11           |
| eng        | M4    | NA        | 681    | 294     | 983      | 0.41           |
|            |       | NC        | 13961  | 4834    | 19708    | 0.22           |
|            |       | T2        | 493    | 30      | 875      | 0.00*          |
|            |       | T1        | 8247   | 3196    | 17677    | 0.45           |
| spa        | M4    | NA        | 826    | 468     | 991      | 0.41           |
|            |       | NC        | 7609   | 2134    | 19038    | 0.21           |
|            |       | T2        | 413    | 30      | 867      | 0.00*          |
|            |       | T1        | 8032   | 1936    | 18475    | 0.45           |
| bav        | M4    | NA        | 870    | 566     | 995      | 0.41           |
|            |       | NC        | 9483   | 3257    | 19244    | 0.23           |
|            |       | T2        | 421    | 30      | 865      | 0.00*          |
|            |       | T1        | 13343  | 5749    | 18996    | 0.47           |
| fri        | M2    | NA        | 3787   | 1241    | 15593    | 0.29           |
|            |       | NC        | 530    | 125     | 973      | 0.15           |
|            |       | T2        | 437    | 30      | 871      | 0.00*          |
|            |       | T1        | 11399  | 1430    | 19165    | 0.13           |
| gre        | M4    | NA        | 860    | 552     | 993      | 0.42           |
|            |       | NC        | 12958  | 4934    | 19593    | 0.24           |
|            |       | T2        | 468    | 30      | 871      | 0.00*          |
|            |       | T1        | 14617  | 6716    | 19158    | 0.47           |
| tur        | M4    | NA        | 883    | 575     | 995      | 0.39           |
|            |       | NC        | 17150  | 10231   | 19880    | 0.24           |
|            |       | T2        | 504    | 30      | 875      | 0.00*          |
|            |       | T1        | 17568  | 11758   | 19599    | 0.43           |

Populations listed are those for which a model was chosen (Table S6). A point estimate (median) and the 95% credible interval (CI) are given. Times are in years and population sizes are in number of individuals (haploid locus). R<sup>2</sup> is the proportion of the parameter variance explained by the summary statistics.

\* Parameters with a R<sup>2</sup> < 0.1 are considered poorly estimated.

Within the M2+M3 and M4+M5 sets, we estimate parameters of the less parameterised model, namely M2 and M4. The exponential reduction model M2 is favoured for saa, bas and fri, for which we estimate ancestral effective population sizes of about 4000-5000 reducing to about 300-500 currently. For eng, spa, bav, gre and tur the most supported model is M4, with an exponential growth starting with about 700-900 individuals and reaching current effective population sizes of 8000 - 17,000 depending on the population.

**Supplementary Table 8. MSY-haplogroups in ancient European samples.**

| <b>culture</b>   | <b>country</b> | <b>YBP<sup>a</sup></b> | <b>hg</b>        | <b>simple hg<sup>a</sup></b> | <b>N</b> | <b>Ref</b> |
|------------------|----------------|------------------------|------------------|------------------------------|----------|------------|
| Mesolithic HG    | Luxembourg     | 8000                   | I2a1b-L178       | I2                           | 1        | 10         |
| Early Neolithic  | Hungary        | 7700                   | I2a-L460         | I2                           | 1        | 7          |
| Hunter Gatherer  | Sweden         | 7700                   | I2a1-P37.2       | I2                           | 1        | 4          |
| Hunter Gatherer  | Sweden         | 7700                   | I2a1a1a-L672     | I2                           | 1        | 4          |
| Hunter Gatherer  | Sweden         | 7700                   | I2a1b-M423       | I2                           | 1        | 4          |
| Hunter Gatherer  | Sweden         | 7700                   | I2a1b2a1-L147.2  | I2                           | 1        | 4          |
| Hunter Gatherer  | Sweden         | 7700                   | I2c2-PF3827      | I2                           | 5        | 4          |
| Early Neolithic  | Hungary        | 7600                   | H2-L281          | H2                           | 1        | 4          |
| Hunter Gatherer  | Russia         | 7600                   | R1b1-L278        | R1b1                         | 1        | 4          |
| Hunter Gatherer  | Russia         | 7300                   | R1a1-M459        | R1a                          | 1        | 4          |
| Early Neolithic  | Spain          | 7300                   | F*-P135          | F*                           | 1        | 4          |
| Early Neolithic  | Spain          | 7300                   | I2a1b1-L161.1    | I2                           | 1        | 4          |
| Early Neolithic  | Germany        | 7200                   | T1a-PF5604       | T                            | 1        | 4          |
| Early Neolithic  | Germany        | 7100                   | G2a2a-PF3147     | G2a                          | 1        | 4          |
| Early Neolithic  | Germany        | 7100                   | G2a2a-PF3185     | G2a                          | 1        | 4          |
| Early Neolithic  | Germany        | 7100                   | G2a2a1-PF3170    | G2a                          | 1        | 4          |
| Early Neolithic  | Hungary        | 7100                   | C1a2-V20/V184    | C1                           | 2        | 7          |
| Late Bronze Age  | Hungary        | 7100                   | J2a1-S57         | J2                           | 1        | 7          |
| Early Neolithic  | Spain          | 7100                   | R1b1-M415        | R1b1                         | 1        | 4          |
| Early Neolithic  | Germany        | 7000                   | G2a2a1-PF3155    | G2a                          | 1        | 4          |
| Early Neolithic  | Spain          | 7000                   | E1b1b1a1b1a-V13  | E1b1b                        | 1        | 12         |
| Early Neolithic  | Spain          | 7000                   | G2a-P15          | G2a                          | 5        | 12         |
| Early Neolithic  | Spain          | 6900                   | C1a2-V20         | C1                           | 1        | 11         |
| Early Neolithic  | Hungary        | 6400                   | I2a-L460         | I2                           | 1        | 7          |
| Early Neolithic  | Germany        | 6300                   | F-M89            | F*                           | 2        | 3          |
| Early Neolithic  | Germany        | 6200                   | G2a2b-S126       | G2a                          | 1        | 3          |
| Middle Neolithic | Germany        | 5900                   | F*-P316          | F*                           | 1        | 4          |
| Middle Neolithic | Spain          | 5800                   | H2/I2a1a1-L672   | I2                           | 1        | 4          |
| Middle Neolithic | Spain          | 5800                   | I2a2a1-CTS9183   | I2                           | 1        | 4          |
| Middle Neolithic | Germany        | 5600                   | R*?-P224         | R*                           | 1        | 4          |
| Early Neolithic  | Hungary        | 5600                   | F-M89            | F*                           | 3        | 8          |
| Early Neolithic  | Hungary        | 5600                   | G2a-P15          | G2a                          | 5        | 8          |
| Early Neolithic  | Hungary        | 5600                   | G2a2b-S126       | G2a                          | 4        | 8          |
| Early Neolithic  | Hungary        | 5600 <sup>b</sup>      | I-M170           | I*                           | 1        | 8          |
| Early Neolithic  | Hungary        | 5600 <sup>b</sup>      | I1-M253          | I1                           | 1        | 8          |
| Early Neolithic  | Hungary        | 5600 <sup>b</sup>      | I2a1-P37.2       | I2                           | 1        | 8          |
| Neolithic HG     | Sweden         | 5600                   | I2a1-P37.2       | I2                           | 1        | 13         |
| Middle Neolithic | Germany        | 5200                   | I2a1b1a-L1498    | I2                           | 1        | 4          |
| Middle Neolithic | Italy          | 5200                   | G2a2a1b-L91      | G2a                          | 1        | 9          |
| Steppe Yamnaya   | Russia         | 5100                   | R1b1a-P297       | R1b1a                        | 1        | 4          |
| Steppe Yamnaya   | Russia         | 5100                   | R1b1a2a-L49.1    | R1b1a                        | 1        | 4          |
| Steppe Yamnaya   | Russia         | 5100                   | R1b1a2a2-CTS1078 | R1b1a                        | 1        | 4          |
| Steppe Yamnaya   | Russia         | 5100                   | R1b1a2a2-CTS1078 | R1b1a                        | 1        | 4          |
| Steppe Yamnaya   | Russia         | 5100                   | R1b1a2a2-Z2105   | R1b1a                        | 1        | 4          |
| Middle Neolithic | France         | 5000                   | G2a-P15          | G2a                          | 20       | 1          |
| Middle Neolithic | France         | 5000                   | I2a1-P37.2       | I2                           | 2        | 1          |
| Steppe Yamnaya   | Russia         | 4900                   | R1b1a2a2-CTS1078 | R1b1a                        | 1        | 4          |
| Steppe Yamnaya   | Russia         | 4800                   | R1b1a2a2-Z2105   | R1b1a                        | 1        | 4          |
| Middle Neolithic | France         | 4700                   | I2a1             | I2                           | 2        | 2          |
| Late Neolithic   | Germany        | 4600                   | R1b-M343         | R1b                          | 1        | 6          |
| Late Neolithic   | Germany        | 4600                   | R1b1a2-M269      | R1b1a                        | 1        | 6          |
| Late Neolithic   | Germany        | 4400                   | R1a1a1-M417      | R1a                          | 1        | 4          |
| Late Neolithic   | Germany        | 4300                   | R1b1a2a1a2-P312  | R1b1a                        | 1        | 4          |
| Early Bronze Age | Germany        | 4100                   | I2-L68           | I2                           | 1        | 4          |
| Early Bronze Age | Germany        | 4100                   | I2a2-L368        | I2                           | 1        | 4          |
| Early Bronze Age | Germany        | 4100                   | I2c2-PF3827      | I2                           | 1        | 4          |
| Late Neolithic   | Germany        | 4100                   | R1a1-SRY10831.2  | R1a                          | 1        | 5          |
| Early Bronze Age | Germany        | 3100                   | R1a1a1b1a2-S204  | R1a                          | 1        | 4          |

YBP: years before present; hg: haplogroup; N: number of samples; HG: hunter-gatherer

<sup>a</sup> As used for Figure 3.

<sup>b</sup> Assumed from archaeological context.

**Supplementary Table 9. Software tools and parameters used in data analysis.**

| Function                         | Tool                                     | Package          | Parameters                                                                                                                                                                                                                 |
|----------------------------------|------------------------------------------|------------------|----------------------------------------------------------------------------------------------------------------------------------------------------------------------------------------------------------------------------|
| Call bases                       | Illumina Bustard                         |                  |                                                                                                                                                                                                                            |
| Quality control                  | FastQC                                   |                  |                                                                                                                                                                                                                            |
| Map reads                        | Stampy v1.0.20                           |                  | -g GRCh37 -h GRCh37 --fast --insertsize=330 --insertsd=120 --xa-max=2 --xa-max-discordant=2                                                                                                                                |
| Local realignment                | RealignerTargetCreator<br>IndelRealigner | GATK v2.6-5      | -R GRCh37<br>-R GRCh37 -targetIntervals<br>file_made_by_RealignerTargetCreator                                                                                                                                             |
| Duplicate marking                | MarkDuplicates                           | Picard v1.86     | N/A                                                                                                                                                                                                                        |
| Base quality score recalibration | BaseRecalibrator                         | GATK v2.6-5      | -R GRCh37 --covariate CycleCovariate --covariate ContextCovariate -knownSites broad_dbsnp -knownSites known_phase1_indels -knownSites known_mills_indels<br>(plus ReadGroupCovariate and QualityScoreCovariate by default) |
| Raw sequence depth               | CalculateHsMetrics                       | Picard v1.93     | BAIT_INTERVALS= analysed_coordinate_file<br>TARGET_INTERVALS=original_8target_intervals                                                                                                                                    |
| SNP calling                      | mpileup<br>bcftools view                 | SAMtools v0.1.19 | -Q 20 -q 50 -I -D -S -g -O -s -f B37 -l<br>analysed_coordinate_file<br>-v -c -g                                                                                                                                            |
| Filtering                        | Vcftools v0.1.11 and Perl scripts        |                  | Maximum 3x average DP per site across all samples<br>SnpCluster [2,4]<br>Strand bias (SP>13)<br>Minimum DP 6<br>Remove heterozygous calls<br>Maximum missing data per site – 5%<br>Maximum missing data per sample – 5%    |

## Supplementary References

1. Lacan M, *et al.* Ancient DNA reveals male diffusion through the Neolithic Mediterranean route. *Proc Natl Acad Sci U S A* **108**, 9788-9791 (2011).
2. Lacan M. La Néolithisation du bassin méditerranéen: Apports de l'ADN ancien. (ed<sup>^</sup>(eds). Université Toulouse III Paul Sabatier (2011).
3. Haak W, *et al.* Ancient DNA from European early neolithic farmers reveals their near eastern affinities. *PLoS Biol* **8**, e1000536 (2010).
4. Haak W, *et al.* Massive migration from the steppe is a source for Indo-European languages in Europe. *BioArxiv*, (2015).
5. Haak W, *et al.* Ancient DNA, Strontium isotopes, and osteological analyses shed light on social and kinship organization of the Later Stone Age. *Proc Natl Acad Sci U S A* **105**, 18226-18231 (2008).
6. Lee EJ, *et al.* Emerging genetic patterns of the European Neolithic: perspectives from a late Neolithic Bell Beaker burial site in Germany. *Am J Phys Anthropol* **148**, 571-579 (2012).
7. Gamba C, *et al.* Genome flux and stasis in a five millennium transect of European prehistory. *Nat Commun* **5**, 5257 (2014).
8. Szécsényi-Nagy A, *et al.* Tracing the genetic origin of Europe's first farmers reveals insights into their social organization. *BioArxiv*, (2014).
9. Keller A, *et al.* New insights into the Tyrolean Iceman's origin and phenotype as inferred by whole-genome sequencing. *Nat Commun* **3**, 698 (2012).
10. Lazaridis I, *et al.* Ancient human genomes suggest three ancestral populations for present-day Europeans. *Nature* **513**, 409-413 (2014).
11. Olalde I, *et al.* Derived immune and ancestral pigmentation alleles in a 7,000-year-old Mesolithic European. *Nature* **507**, 225-228 (2014).
12. Lacan M, *et al.* Ancient DNA suggests the leading role played by men in the Neolithic dissemination. *Proc Natl Acad Sci U S A* **108**, 18255-18259 (2011).
13. Skoglund P, *et al.* Genomic diversity and admixture differs for Stone-Age Scandinavian foragers and farmers. *Science* **344**, 747-750 (2014).
